# Supplementary material
Source: Springer Nature journal article supplement (https://www.springermedizin.de/resource/supplementary/12955_2008_471_MOESM1_ESM.pdf/9560526)
Supplement: MOESM1 [file 9560526]

Symptom Domains Obtained from Common Disease Activity Indices and Endorsed by Patient Focus Groups (N=16)

|                       |                    |
|-----------------------|--------------------|
| Frequency             | Eye Pain / Redness |
| Urgency               | Fever              |
| Loose stools          | Anti-diarrheal use |
| Night bowel movements | Incontinence       |
| Abdominal pain        | Nausea             |
| Anorexia              | Cramping           |
| Erythema Nodosum      | Joint Pain         |
| Pyoderma Gangrenosum  | Stool blood        |

Novel Symptom Domains Obtained from UC Patient Focus Groups (N=12)

|                                                                                |               |
|--------------------------------------------------------------------------------|---------------|
| Abdominal distention                                                           | Flatulence    |
| Stool mucus                                                                    | Tenesmus      |
| Lightheadedness                                                                | Mouth ulcers  |
| Fatigue                                                                        | Insomnia      |
| Loud bowel sounds                                                              | Low back pain |
| Rapid bowel movements after eating                                             |               |
| Inability to differentiate liquid or gas from solid when rectal urgency occurs |               |

Evaluate 28 Symptom Domains with 100 point Visual Analog Scale Ratings for 3 Criteria:

1. Occurs During Flares
2. Improves with Therapy
3. Absent During Remission

Determine whether each symptom domain is important: defined as when all 3 median VAS scores are significantly greater than 50 ( 2 sided  $p > 0.05$ ) by the sign test.

Meets Criteria

Does Not Meet Criteria

Frequent and Responsive Symptom Domains

Infrequent or Unresponsive Symptom Domains
